# Supplementary material for: Automated Evidence Synthesis of Cognitive Interventions in Older People using the CogTale Platform: A Validation Study
Source: Research Square preprint supplement (doi:10.21203/rs.3.rs-7078540/v1), 2025-07-23
Supplement: Supplementary file 1 [file 5223748542926b56e2303589.docx]

| **Table 2.** Replication Criterion Evaluation | | | | | | | | | |
| --- | --- | --- | --- | --- | --- | --- | --- | --- | --- |
| **Review** | **Outcome** | **Direction of  the estimate** | **Equivalence of  point estimate** | **Overlapping  95% CIs** | **Effect  magnitude** | **Certainty in the estimate** | **Stringent Threshold** | **Lenient Threshold** |
| CST | Cognition | ✓ | ✓ | ✓ | ✓ | ✓ | ✓ | ✓ |
| Quality of Life (PR) | ✓ | ✓ | ✓ | ○ | ✓ | ✓ | ✓ |
| Communication and social interaction | ✓ | ✓ | ✓ | ○ | ○ | ✓ | ✓ |
| Mood: (PR) | ✓ | ✓ | ✓ | ✓ | ○ | ✓ | ✓ |
| Mood: (IR) | ✓ | ✓ | ✓ | ✓ | ○ | ✓ | ✓ |
| Instrumental ADL | ✓ | ✓ | ✓ | ✓ | ✓ | ✓ | ✓ |
| Behaviour that challenges | ✓ | ✓ | ✓ | ✓ | ✓ | ✓ | ✓ |
| CT | Change in a global measure of cognition (composite) | ✓ | ✓ | ✓ | ✓ | ✓ | ✓ | ✓ |
| Change in a global measure of cognition | ✓ | ✓ | ✓ | ○ | ○ | ✓ | ✓ |
| Change in delayed memory | ✓ | ✓ | ✓ | ○ | ● | ● | ✓ |
| Change in participants' mood | ✓ | ✓ | ✓ | ✓ | ● | ● | ✓ |
|  | Change in capacity for activities of daily living | ✓ | ✓ | ✓ | ✓ | ● | ● | ✓ |
| CR | Functional ability in targeted activities: personal goals performance (PR) | ✓ | ✓ | ● | ✓ | ✓ | ● | ● |
| Functional ability in targeted activities: personal goals - performance (IR) | ✓ | ✓ | ✓ | ✓ | ○ | ✓ | ✓ |
| General functional ability (IR) | ✓ | ✓ | ✓ | ✓ | ● | ● | ✓ |
| Mood: depression (PR) | ✓ | ✓ | ✓ | ● | ● | ● | ● |
| Quality of life (PR) | ● | ✓ | ✓ | ✓ | ○ | ● | ✓ |
| Quality of life: psychological (PR) | ✓ | ✓ | ✓ | ✓ | ○ | ✓ | ✓ |
| Note. ✓ indicate approximate replication was assumed where there was no evidence of nonreplication.  ○ Indicates a one-category difference in effect size magnitude or certainty in the evidence (e.g., medium vs. small). ● Indicates evidence of nonreplication, including: a) misaligned effect direction; b) inequivalent point estimate; c) non-overlapping 95% CIs; d) substantial differences (two or more categories) in effect size magnitude or certainty in the evidence (e.g., large vs. small). CI = Confidence Intervals | | | | | | | | | |
