# Supplementary material for: Automated Evidence Synthesis of Cognitive Interventions in Older People using the CogTale Platform: A Validation Study
Source: Research Square preprint supplement (doi:10.21203/rs.3.rs-7078540/v1), 2025-07-23
Supplement: Supplementary file 2 [file 977ceb76f07ed8bc7b59d8e1.docx]

| **Table 5.** Study Level Nonreplicated Outcomes | | | | | |
| --- | --- | --- | --- | --- | --- |
| **Review** | **Study** | **Outcome** | **Cochrane  ES  Magnitude** | **CogTale  ES  Magnitude** | **z-score** |
| CT | Barban 2016 | Change in delayed memory | Medium | *Small* | 1.081 |
| Boller 2011 | Small | Small | 0.066 |
| Cahn-Weiner 2003 | Medium | Medium | 2.032 |
| Cavallo 2016 | Large | - | - |
| Davis 2001 | Small | Small | 0.237 |
| Jelcic 2012 | Large | Large | 0.430 |
| Jelcic 2014 | Large | Large | 0.199 |
| Koltai 2001 | Medium | - | - |
| Mapelli 2013 | Large | Large | 0.800 |
| Quayhagen 2000 | Medium | *Small* | 0.433 |
| Trebbastoni 2018 | Medium | Medium | -0.409 |
| Amieva 2016 | Change in participants' mood | Small | Small | 0.067 |
| Bergamaschi 2013 | Medium | Medium | 0.419 |
| Davis 2001 | Small | Small | -0.500 |
| Fernandez-Calvo 2011 | Large | Large | 0.879 |
| Galante 2007 | Large | Small‡ | 1.169 |
| Giuli 2016 | Large | Small‡ | 6.638*** |
| Koltai 2001 | Medium | Medium | -1.257 |
| Lee 2013 | Medium | Medium | -0.029 |
| Amieva 2016 | Change in capacity for activities of daily living | Small | Small | -0.504 |
| Barban 2016 | Small | - | - |
| Bergamaschi 2013 | Medium | Medium | 0.169 |
| Cahn-Weiner 2003 | Small | - | - |
| De Vreese 1998 | Medium | - | - |
| Galante 2007 | Large | *Medium* | -1.566 |
| Giuli 2016 | Medium | Small | 0.765 |
| Jelcic 2012 | Small | Medium | -0.741 |
| Kim 2015 | Small | - | - |
| Lee 2013 | Large | *Small‡* | 2.049 |
| CR | Clare 2010 | Functional ability in targeted activities: personal goals - performance (PR) | Large | *Medium* | 0.925 |
| Clare 2019 | Large | Large | 5.493*** |
| Hindle 2018 | Large | Large | 0.599 |
| Clare 2010 | Mood: depression (PR) | Large | *Medium* | 0.959 |
| Clare 2019 | Small | Small | 0.593 |
| Hindle 2018 | Large | *Medium* | 2.924 |
| Clare 2010 | Quality of life (PR) | Small | Small | -0.76 |
| Clare 2019 | Small | Small | 0.449 |
| Clarkson 2022 | Small | - | - |
| Hindle 2018 | Medium | Medium | 0.107 |
| Thivierge 2014 | Small | Small | 0.238353 |
| Note. *‡ Substantial differences in effect size magnitude of two or more categories (e.g., small vs. large).  Italicised text highlights differences of one category (e.g., small vs. moderate). ***p < .001, **p < .01, *p < .05. ES = Effect size. PR = Participant self-report. IR = Informant report of participant* | | | | | |
