# Supplementary material for: Automated Evidence Synthesis of Cognitive Interventions in Older People using the CogTale Platform: A Validation Study
Source: Research Square preprint supplement (doi:10.21203/rs.3.rs-7078540/v1), 2025-07-23
Supplement: Supplementary file 3 [file b93bbaa4bdeecdca0b760b4c.docx]

**Table 1**. Methodological features and findings of recent Cochrane Reviews of CR, CT, and CST.

| **Cochrane Review** | **COT** | **Population** | ***k*** | *N (max)* | **Main Findings (per Summary of Findings Tables)** |
| --- | --- | --- | --- | --- | --- |
| Woods et al. (2023) | CST | People with dementia | 37 | 2766 | **High-certainty evidence**:  Improved communication, social interaction, mood, and anxiety. Cognitive improvements were more pronounced with frequent group sessions. **Moderate-certainty evidence**:  Small cognitive benefits, clinically significant differences in MMSE scores, and slight improvements in QoL. |
| Bahar-Fuchs et al. (2019) | CT | People with  mild to moderate dementia | 33 | 2000 | **High-certainty evidence**:  Improved verbal semantic fluency. **Moderate-certainty evidence**:  Improved global cognition.  **Low-certainty evidence**:  Unclear effects on clinical disease severity, mood, and activities of daily living. |
| Kudlicka et al. (2023) | CR | People with  mild to moderate dementia | 6 | 1702 | **High-certainty evidence**:  Improved goal attainment and satisfaction with sustained benefits at medium-term follow-up.  **Moderate-certainty evidence**:  Modest improvements in self-efficacy, immediate recall, and auditory selective attention.  **Low-certainty evidence**: Minor improvements in care partners' Quality of Life. |

*Note. k indicates the number of studies included in the review. N (max) indicates the maximum number of participants across all studies per review*
