# Supplementary material for: Automated Evidence Synthesis of Cognitive Interventions in Older People using the CogTale Platform: A Validation Study
Source: Research Square preprint supplement (doi:10.21203/rs.3.rs-7078540/v1), 2025-07-23
Supplement: Supplementary file 4 [file df884759e1b368d5a9c3ac86.docx]

| **Table 3.** Comparison of Cochrane and CogTale Effect Size Magnitudes and Certainty in the Estimate Ratings with Z-Scored Differences | | | | | | |
| --- | --- | --- | --- | --- | --- | --- |
| **Review** | **Outcome** | **z-score (p-value)** | **Cochrane  ES Magnitude** | **CogTale  ES Magnitude** | **Cochrane  Certainty in**  **the estimate** | **CogTale  Certainty in**  **the estimate** |
| CST | Cognition | 0.409 (0.682) | Medium | Medium | Moderate | Moderate |
| Quality of Life (PR) | -0.597 (0.551) | Small | *Medium* | Moderate | Moderate |
| Communication and social interaction | -1.163 (0.245) | Small | *Medium* | High | *Moderate* |
| Mood: (PR) | -0.122 (0.903) | Small | Small | High | *Moderate* |
| Mood: (IR) | -0.642 (0.521) | Medium | Medium | Low | *Moderate* |
| Instrumental ADL | 0.371 (0.710) | Small | Small | High | High |
| Behaviour that challenges | -0.185 (0.853) | Small | Small | Moderate | Moderate |
| CT | Change in a global measure of cognition  (composite) | -0.463 (0.643) | Medium | Medium | Moderate | Moderate |
| Change in a global measure of cognition | 1.222 (0.222) | Medium | *Small* | Low | *Moderate* |
| **Change in delayed memory** | -0.181 (0.857) | **Large** | ***Medium*** | **Very Low** | ***Moderate†*** |
| **Change in participants' mood** | 1.211 (0.226) | **Medium** | **Medium** | **Very Low** | ***Moderate†*** |
| **Change in capacity for activities of daily living** | 0.484 (0.628) | **Small** | **Small** | **Low** | ***High†*** |
| CR | **Functional ability in targeted activities:  personal goals - performance (PR)** | 2.832 (0.005) | **Large** | **Large** | **High** | **High** |
| Functional ability in targeted activities:  personal goals - performance (IR) | 0.643 (0.520) | Large | Large | High | *Moderate* |
| **General functional ability (IR)** | 0.224 (0.823) | **Small** | **Small** | **Low** | ***High†*** |
| **Mood: depression (PT)** | 1.220 (0.222) | **Large** | ***Small‡*** | **Very low** | ***Moderate†*** |
| **Quality of life (PR)** | -0.523 (0.601) | **Small** | **Small** | **Moderate** | ***High*** |
| Quality of life: psychological (PR) | 0.546 (0.585) | Small | Small | Moderate | *High* |

*Note.* *‡ Substantial differences in effect size magnitude of two or more categories (e.g., small vs. large) † Substantial differences in certainty in the evidence ratings of two or more categories (e.g., very low vs. moderate). Italicised text highlights differences of one category (e.g., small vs. moderate). Bold text indicates evidence of nonreplication. ***p < .001, **p < .01, *p < .05.
ES = Effect size. PR = Participant self-report. IR = Informant report of participant.*
