# Supplementary material for: Automated Evidence Synthesis of Cognitive Interventions in Older People using the CogTale Platform: A Validation Study
Source: Research Square preprint supplement (doi:10.21203/rs.3.rs-7078540/v1), 2025-07-23
Supplement: Supplementary file 5 [file f99981b48e86f7b9dc52d510.docx]

| **Review** |  | **Outcome** | **Direction of the estimate** | **Equivalence of point estimate** | **Overlapping 95% CIs** | **Effect magnitude** | **Stringent Threshold** | **Lenient Threshold** |  |  |  |
| --- | --- | --- | --- | --- | --- | --- | --- | --- | --- | --- | --- |
| CT | Barban 2016 | Change in delayed memory | ✓ | ✓ | ✓ | ○ | ✓ | ✓ |
| Boller 2011 | ✓ | ✓ | ✓ | ✓ | ✓ | ✓ |
| Cahn-Weiner 2003 | ● | ✓ | ✓ | ✓ | ● | ✓ |
| Davis 2001 | ✓ | ✓ | ✓ | ✓ | ✓ | ✓ |
| Jelcic 2012 | ✓ | ✓ | ✓ | ✓ | ✓ | ✓ |
| Jelcic 2014 | ✓ | ✓ | ✓ | ✓ | ✓ | ✓ |
| Mapelli 2013 | ✓ | ✓ | ✓ | ✓ | ✓ | ✓ |
| Quayhagen 2000 | ✓ | ✓ | ✓ | ○ | ✓ | ✓ |
| Trebbastoni 2018 | ✓ | ✓ | ✓ | ○ | ✓ | ✓ |
| Amieva 2016 | Change in participants' mood | ✓ | ✓ | ✓ | ✓ | ✓ | ✓ |
| Bergamaschi 2013 | ✓ | ✓ | ✓ | ✓ | ✓ | ✓ |
| Davis 2001 | ✓ | ✓ | ✓ | ✓ | ✓ | ✓ |
| Fernandez-Calvo 2011 | ✓ | ✓ | ✓ | ✓ | ✓ | ✓ |
| Galante 2007 | ● | ✓ | ✓ | ● | ● | ● |
| Giuli 2016 | ● | ● | ● | ● | ● | ● |
| Koltai 2001 | ● | ✓ | ✓ | ✓ | ● | ✓ |
| Lee 2013 | ✓ | ✓ | ✓ | ✓ |  | ✓ |
| Amieva 2016 | Change in capacity for activities of daily living | ● | ✓ | ✓ | ✓ | ● | ✓ |
| Bergamaschi 2013 | ✓ | ✓ | ✓ | ✓ | ✓ | ✓ |
| Galante 2007 | ● | ✓ | ✓ | ○ | ● | ✓ |
| Giuli 2016 | ✓ | ✓ | ✓ | ○ | ✓ | ✓ |
| Jelcic 2012 | ✓ | ✓ | ✓ | ○ | ✓ | ✓ |
| Kim 2015 | ✓ | ✓ | ✓ | ✓ | ✓ | ✓ |
| Lee 2013 | ● | ✓ | ✓ | ● | ● | ● |

**Table 4*.*** Study Level Replication Criterion Evaluation

| CR | Clare 2010 | Functional ability in targeted activities: personal goals - performance (PR) | ✓ | ✓ | ✓ | ○ | ✓ | ✓ |
| --- | --- | --- | --- | --- | --- | --- | --- | --- |
| Clare 2019 | ✓ | ● | ● | ✓ | ● | ● |
| Hindle 2018 | ✓ | ✓ | ✓ | ✓ | ✓ | ✓ |
| Amieva 2016 | General functional ability (IR) | ✓ | ✓ | ✓ | ✓ | ✓ | ✓ |
| Clarkson 2022 | ✓ | ✓ | ✓ | ✓ | ✓ | ✓ |
| Thivierge 2014 | ✓ | ✓ | ✓ | ○ | ✓ | ✓ |
| Clare 2010 | Mood: depression (PR) | ✓ | ✓ | ✓ | ○ | ✓ | ✓ |
| Clare 2019 | ● | ✓ | ✓ | ✓ | ● | ✓ |
| Hindle 2018 | ✓ | ✓ | ● | ○ | ● | ● |
| Clare 2010 | Quality of life (PR) | ● | ✓ | ✓ | ✓ | ● | ✓ |
| Clare 2019 | ● | ✓ | ✓ | ✓ | ● | ✓ |
| Hindle 2018 |  | ✓ | ✓ | ✓ | ✓ | ✓ |
| Thivierge 2014 | ● | ✓ | ✓ | ✓ | ● | ✓ |
| Note. Blank cells indicate replication was assumed where there was no evidence of nonreplication. ○ Indicates a one-category difference in effect size magnitude or certainty in the evidence (e.g., medium vs. small). ● Indicates evidence of nonreplication, including a) misaligned effect direction; b) inequivalent point estimate; c) non-overlapping 95% CIs; d) substantial differences (two or more categories) in effect size magnitude or certainty in the evidence (e.g., large vs. small). CI = Confidence Interval. | | | | | | | | |
|  | | | | | | | | |
|  | | | | | | | | |
